# Supplementary material
Source: HighWire-hosted journal article supplement (https://err.ersjournals.com/content/29/158/200039)
Supplement: inline-supplementary-material-1 [file inline-supplementary-material-1.xlsx]

## Sheet: Index
	Appendix 1 - Data extracted from the literature on the different designs of the interventions used in patients with acute exacerbations of chronic obstructive pulmonary disease.
		Table of contents
	Tab. 1	Components of the intervention used by setting.
	Tab. 2	Types of training used for the aerobic training component, by setting.
	Tab. 3	Types of training used for the strength training component, by setting.
	Tab. 4	Techniques used in the breathing techniques component, by setting.
	Tab. 5	Themes addressed and support given in the education and psychossocial support component, by setting.
	Tab. 6	Detailed description of the different interventions used for patients with acute exacerbations of chronic obstructive pulmonary disease.
	Tab. 7	List of all the outcomes and outcome measures used to assess the effectiveness of the interventions and respective effect sizes.
	Tab. 8	Reference list of the included papers.

## Sheet: Components by setting
	1. Components of the intervention used by setting.
	Study references in which each component was used are also presented. Please refer to "Tab. 8 - References" for the reference list.
	Setting	Number of studies
	Community	2
	Aerobic training	2
	[35] [44]
	Strength training	2
	[35] [44]
	Education & psychossocial support	2
	[35] [44]
	Home	11
	Aerobic training	4
	[18] [21] [36] [44]
	Strength training	5
	[18] [21] [36] [44] [56]
	Breathing techniques	2
	[18] [56]
	Education & psychossocial support	9
	[18] [19] [21] [39] [47] [56] [57] [58] [59]
	Inpatient	34
	Aerobic training	15
	[22] [23] [24] [27] [29] [31] [32] [34] [37] [39] [40] [41] [45] [52] [53]
	Strength training	13
	[23] [24] [26] [29] [31] [34] [37] [40] [42] [43] [46] [51] [53]
	Breathing techniques	19
	[20] [22] [25] [26] [31] [34] [37] [39] [40] [42] [43] [48] [49] [50] [51] [53] [54] [55] [57]
	Education & psychossocial support	18
	[18] [19] [20] [22] [23] [24] [26] [29] [31] [34] [39] [46] [47] [49] [50] [57] [58] [59]
	Electrical stimulation	4
	both quadriceps, 30min/day, 35Hz	1
	[27]
	both quadriceps, 30min/day, 50Hz	4
	[27] [45] [46] [53]
	Respiratory muscle training	1
	2sessions/day, 10min/session, 50% of MIP	1
	[37]
	Whole body vibration	1
	3x2min/day, 26Hz	1
	[30]
	Outpatient	8
	Aerobic training	8
	[23] [24] [28] [29] [33] [38] [39] [44]
	Strength training	7
	[23] [24] [28] [29] [33] [38] [44]
	Breathing techniques	2
	[28] [39]
	Education & psychossocial support	7
	[23] [24] [28] [29] [38] [39] [44]

## Sheet: Aerobic training
	2. Types of training used for the aerobic training component, by setting.
	Study references in which each type of training was used are also presented. Please refer to "Tab. 8 - References" for the reference list.
	For more details of the design of the aerobic training used in each study please refer to "Tab. 6 - Interventions".
	Aerobic training	Number of studies
	Community
	Type of training	6
	Cycling	2
	Walk	2
	Rowing	1
	Step up/down bench	1
	Home
	Type of training	5
	Pedal exerciser	1
	Sit/stand from a chair	1
	Step up/down stairs	1
	Walk	2
	Inpatient
	Type of training	19
	Climb stairs	1
	Cycling	4
	Not stated	1
	Pedal exerciser	1
	Upper limb endurance training	1
	Walk	11
	Outpatient
	Type of training	13
	Arm cycling	1
	Cycling	2
	Not stated	3
	Walk	5
	Rowing	1
	Step up/down bench	1

## Sheet: Strength training
	3. Types of training used for the strength training component, by setting.
	Study references in which each type of training was used are also presented. Please refer to "Tab. 8 - References" for the reference list.
	For more details of the design of the strength training used in each study please refer to "Tab. 6 - Interventions".
	Strength training	Number of studies
	Community
	Type of training
	Upper and lower limbs	2
	Home
	Type of training
	Upper and lower limbs	3
	Upper limbs	2
	Inpatient
	Type of training
	Lower limbs	4
	Not stated	2
	Upper and lower limbs	6
	Upper limbs	1
	Outpatient
	Type of training
	Not stated	1
	Upper and lower limbs	6

## Sheet: Breathing techniques
	4. Techniques used in the breathing techniques component, by setting.
	Study references in which each technique was used are also presented. Please refer to "Tab. 8 - References" for the reference list.
	For more details of the design of the breathing techniques component used in each study please refer to "Tab. 6 - Interventions".
	Breathing techniques	Number of studies
	Home
	Techniques used
	Airway clearance techniques	1
	Inpatient
	Techniques used
	Active cycle of breathing technique	4
	Active expiration	2
	Airway clearance techniques	3
	Breathing control	3
	Breathing exercises	1
	Cough	3
	Deep breathing exercises	2
	ELTGOL	1
	Huff	1
	PEP devices	1
	PEP mask	2
	Percussion	1
	Positioning	2
	Postural drainage	2
	Pursed lips breathing	5
	Respiratory physiotherapy	2
	Vibration	2
	Outpatient
	Techniques used
	Airway clearance techniques	1
	Diaphragmatic breathing	1
	Pursed lips breathing	2

## Sheet: Education&Psychossocial support
	5. Themes addressed and support given in the education and psychossocial support component, by setting.
	Study references in which each theme was addressed or support was given are also presented. Please refer to "Tab. 8 - References" for the reference list.
	For more details of the design of the education and psychossocial support used in each study please refer to "Tab. 6 - Interventions".
	Education & Psychossocial support	Number of studies
	Community
	Themes & support given
	Airway clearance	1
	Disease knowledge	1
	Exercise programme	1
	Lifestyle	1
	Medication	1
	Nutrition	2
	Self-management	2
	Smoking cessation	1
	Symptoms management	1
	Home
	Themes & support given
	Access to case manager	2
	Discharge coordinator	1
	Discharge plan	2
	Disease knowledge	2
	Exacerbations	2
	Individual care plan	3
	Lifestyle	1
	Living a Healthy Life with Chronic Conditions	1
	Medication	1
	Nutrition	1
	Patient empowerment	2
	Physical activity	1
	Pulmonary rehabilitation	1
	Respiratory physiology	1
	Self-care support	3
	Self-management	4
	Self-management Program of Activity, Coping, and Education for COPD	1
	Smoking cessation	2
	Symptoms management	1
	Inpatient
	Themes & support given
	Airway clearance	4
	Discharge plan	1
	Disease knowledge	6
	Energy conservation techniques	1
	Exacerbations	5
	Exercise programme	1
	Individual care plan	1
	Lifestyle	2
	Living well with COPD	1
	Medication	6
	Non-pharmacological treatments	2
	Nutrition	2
	Patient empowerment	1
	Physical activity	6
	Pulmonary rehabilitation	1
	Respiratory physiology	1
	Self-care support	1
	Self-management	7
	Smoking cessation	4
	Symptoms management	3
	Written action plan for an exacerbation	1
	Outpatient
	Themes & support given
	Airway clearance	2
	Behaviour modification	1
	Disease knowledge	3
	Dyspnoea relief and energy conservation techniques	1
	End-of-life issues	1
	Exercise programme	2
	Living well with COPD	1
	Living with a chronic illness	1
	Medication	4
	Nutrition	2
	Physical activity	1
	Respiratory physiology	1
	Self-management	4
	Smoking cessation	1
	Symptoms management	3
	Vaccination	1
	Written action plan for an exacerbation	1

## Sheet: Interventions
	6. Detailed description of the different interventions used for patients with acute exacerbations of chronic obstructive pulmonary disease.
	Study references in which each intervention was used are also presented. Please refer to "Tab. 8 - References" for the reference list.
	Setting	Timing	Component	Description	Duration of intervention	Frequency of sessions	Duration of sessions	Intensity of intervention	Year of publication	Reference
	Home	At discharge	Aerobic training	Pedal exerciser	Not stated	Not stated	Not stated	Not stated	2016	[18]
	Home	Not stated	Aerobic training	Walk	Not stated	1 session/day	Not stated	Not stated	2016	[21]
	Inpatient	Within 48h of admission	Aerobic training	Walk	Until discharge	1 session/day	20min/session	Not stated	2014	[22]
	Inpatient	Within 2 weeks	Aerobic training	Not stated	3 weeks	Not stated	Not stated	Not stated	2012	[23]
	Outpatient	Within 2 weeks	Aerobic training	Not stated	9-12 weeks	Not stated	Not stated	Not stated	2012	[23]
	Inpatient	Within 24h of clinical stabilization	Aerobic training	Walk	3-4 days	3 sessions/week	20min/session	75% of maximal workload achieved at CPET	2014	[24]
	Inpatient	Within 24h of clinical stabilization	Aerobic training	Cycling	3-4 days	3 sessions/week	20min/session	75% of maximal workload achieved at CPET	2014	[24]
	Outpatient	Within 24h of clinical stabilization	Aerobic training	Walk	3 weeks	3 sessions/week	20min/session	75% of maximal workload achieved at CPET	2014	[24]
	Outpatient	Within 24h of clinical stabilization	Aerobic training	Cycling	3 weeks	3 sessions/week	20min/session	75% of maximal workload achieved at CPET	2014	[24]
	Inpatient	Within 11 days of admission	Aerobic training	Walk	Until discharge	1 session/day	30min/session	Not stated	2013	[27]
	Outpatient	Within 2 weeks of hospital discharge	Aerobic training	Not stated	12 weeks	Not stated	Not stated	Not stated	2014	[28]
	Inpatient	As soon as medical appropriate	Aerobic training	Walk	Until discharge	1 session/day	≥30min/day	Not stated	2009	[29]
	Outpatient	As soon as medical appropriate	Aerobic training	Walk	8 weeks	2 sessions/week	1h/session	Not stated	2009	[29]
	Inpatient	From the second day of admission	Aerobic training	Walk	Until discharge	2 sessions/day	30min/session	60% of peak work rate in 6MWT; Dyspnoea between 3-5 at modified Borg	2015	[31]
	Inpatient	From the second day of admission	Aerobic training	Upper limb endurance training	Until discharge	2 sessions/day	30min/session	Dyspnoea between 3-5 at modified Borg	2015	[31]
	Inpatient	6-8 days after admission	Aerobic training	Walk	10 days	5 sessions/day	Not stated	at least 75% of treadmill walking distance	1998	[32]
	Outpatient	2-3weeks after discharge	Aerobic training	Walk	8 weeks	3 sessions/week	2h/session	60-70% of VO2max	2011	[33]
	Outpatient	2-3weeks after discharge	Aerobic training	Arm cycling	8 weeks	3 sessions/week	2h/session	60-70% of VO2max	2011	[33]
	Inpatient	Not stated	Aerobic training	Walk	4 days	2 sessions/day	1h/session	Not stated	2015	[34]
	Community	Within 10 days of hospital discharge	Aerobic training	Walk	8 weeks	2 sessions/week	2h/session	Not stated	2004	[35]
	Community	Within 10 days of hospital discharge	Aerobic training	Cycling	8 weeks	2 sessions/week	2h/session	Not stated	2004	[35]
	Home	From discharge	Aerobic training	Step up/down stairs	6 weeks	2 sessions/week	30-40min/session	Symptoms between 3-5 at modified Borg	2005	[36]
	Home	From discharge	Aerobic training	Sit/stand from a chair	6 weeks	2 sessions/week	30-40min/session	Symptoms between 3-5 at modified Borg	2005	[36]
	Inpatient	3-5 days after admission	Aerobic training	Walk	Until discharge	2 sessions/day	30-45min/session	70% of the walking load achieved; Dyspnoea <6 at modified Borg	1998	[37]
	Inpatient	3-5 days after admission	Aerobic training	Cycling	Until discharge	2 sessions/day	30-45min/session	15W; Dyspnoea <6 at modified Borg	1998	[37]
	Inpatient	3-5 days after admission	Aerobic training	Climb stairs	Until discharge	2 sessions/day	30-45min/session	Dyspnoea <6 at modified Borg	1998	[37]
	Outpatient	Within 1 week of hospital discharge	Aerobic training	Not stated	8 weeks	2 sessions/week	2h/session	Not stated	2010	[38]
	Inpatient	The day before discharge	Aerobic training	Walk	Not stated	Not stated	Not stated	Not stated	2014	[39]
	Outpatient	The day before discharge	Aerobic training	Walk	Not stated	Not stated	Not stated	Not stated	2014	[39]
	Inpatient	From the second day of admission	Aerobic training	Walk	Until discharge	2 sessions/day	15min/session	40% or 70% of 3-minute walk test	2012	[40]
	Inpatient	From the second day of admission	Aerobic training	Pedal exerciser	Until discharge	Not stated	Not stated	Dyspnoea and fatigue levels <6 at modified Borg	2017	[41]
	Outpatient	Within 2 weeks of hospital discharge	Aerobic training	Walk	7 weeks	2 sessions/week	30min/session	Dyspnoea 4-7 at modified Borg	2020	[44]
	Community	Within 2 weeks of hospital discharge	Aerobic training	Walk	7 weeks	2 sessions/week	30min/session	Dyspnoea 4-7 at modified Borg	2020	[44]
	Home	Within 2 weeks of hospital discharge	Aerobic training	Walk	7 weeks	2 sessions/week	30min/session	85% of VO2max from Incremental shuttle walk test	2020	[44]
	Outpatient	Within 2 weeks of hospital discharge	Aerobic training	Cycling	7 weeks	2 sessions/week	2min/session	Dyspnoea 4-7 at modified Borg	2020	[44]
	Community	Within 2 weeks of hospital discharge	Aerobic training	Cycling	7 weeks	2 sessions/week	2min/session	Dyspnoea 4-7 at modified Borg	2020	[44]
	Outpatient	Within 2 weeks of hospital discharge	Aerobic training	Rowing	7 weeks	2 sessions/week	2min/session	Dyspnoea 4-7 at modified Borg	2020	[44]
	Community	Within 2 weeks of hospital discharge	Aerobic training	Rowing	7 weeks	2 sessions/week	2min/session	Dyspnoea 4-7 at modified Borg	2020	[44]
	Outpatient	Within 2 weeks of hospital discharge	Aerobic training	Step up/down bench	7 weeks	2 sessions/week	2min/session	Dyspnoea 4-7 at modified Borg	2020	[44]
	Community	Within 2 weeks of hospital discharge	Aerobic training	Step up/down bench	7 weeks	2 sessions/week	2min/session	Dyspnoea 4-7 at modified Borg	2020	[44]
	Inpatient	From the second day of admission	Aerobic training	Cycling	Until discharge	1 or 2 sessions/day	30min/session	Not stated	2019	[45]
	Inpatient	At least 2 days after admission and when acute phase had passed	Aerobic training	Walk	Until discharge	3 sessions/day	≤15min/session	Within limits of tolerance	2003	[52]
	Inpatient	From the second day of admission	Aerobic training	Cycling	Until discharge	1 session/day	45min/session	Not stated	2018	[53]
	Home	At discharge	Breathing techniques	Pursed lips breathing	Not stated	Not stated	Not stated	Not applicable	2016	[18]
	Inpatient	Not stated	Breathing techniques	Active cycle of breathing technique	Not stated	Not stated	Not stated	Not applicable	2012	[20]
	Inpatient	Not stated	Breathing techniques	Positioning	Not stated	Not stated	Not stated	Not applicable	2012	[20]
	Inpatient	Not stated	Breathing techniques	Percussion	Not stated	Not stated	Not stated	Not applicable	2012	[20]
	Inpatient	Not stated	Breathing techniques	Vibration	Not stated	Not stated	Not stated	Not applicable	2012	[20]
	Inpatient	Within 48h of admission	Breathing techniques	Huff	Until discharge	Not stated	Not stated	Not applicable	2014	[22]
	Inpatient	Within 48h of admission	Breathing techniques	Cough	Until discharge	Not stated	Not stated	Not applicable	2014	[22]
	Inpatient	Within 48h of admission	Breathing techniques	PEP mask	Until discharge	Not stated	Not stated	10-20cmH2O	2014	[22]
	Inpatient	At the time of admission	Breathing techniques	Positioning	Not stated	≥2 sessions/day	Not stated	Not applicable	2010	[25]
	Inpatient	At the time of admission	Breathing techniques	Breathing control	Not stated	≥2 sessions/day	Not stated	Not applicable	2010	[25]
	Inpatient	At the time of admission	Breathing techniques	Active cycle of breathing technique	Not stated	≥2 sessions/day	Not stated	Not applicable	2010	[25]
	Inpatient	From the third day of hospitalization	Breathing techniques	Airway clearance techniques	Not stated	1 session/day	Not stated	Not applicable	2014	[26]
	Outpatient	Within 2 weeks of hospital discharge	Breathing techniques	Airway clearance techniques	12 weeks	Not stated	Not stated	Not applicable	2014	[28]
	Outpatient	Within 2 weeks of hospital discharge	Breathing techniques	Pursed lips breathing	12 weeks	Not stated	Not stated	Not applicable	2014	[28]
	Outpatient	Within 2 weeks of hospital discharge	Breathing techniques	Diaphragmatic breathing	12 weeks	Not stated	Not stated	Not applicable	2014	[28]
	Inpatient	Within the first 24h of hospitalization	Breathing techniques	Respiratory physiotherapy	Until discharge	Not stated	Not stated	Not applicable	2014	[30]
	Inpatient	From the second day of admission	Breathing techniques	Breathing control	Until discharge	2 sessions/day	30min/session	Not applicable	2015	[31]
	Inpatient	From the second day of admission	Breathing techniques	Pursed lips breathing	Until discharge	2 sessions/day	30min/session	Not applicable	2015	[31]
	Inpatient	Not stated	Breathing techniques	Pursed lips breathing	4 days	2 sessions/day	30min/session	Not applicable	2015	[34]
	Inpatient	Not stated	Breathing techniques	Deep breathing exercises	4 days	2 sessions/day	30min/session	Not applicable	2015	[34]
	Inpatient	Not stated	Breathing techniques	Postural drainage	4 days	2 sessions/day	30min/session	Not applicable	2015	[34]
	Inpatient	Not stated	Breathing techniques	Vibration	4 days	2 sessions/day	30min/session	Not applicable	2015	[34]
	Inpatient	3-5 days after admission	Breathing techniques	Postural drainage	Until discharge	2 sessions/day	30-45min/session	Not applicable	1998	[37]
	Inpatient	3-5 days after admission	Breathing techniques	Cough	Until discharge	2 sessions/day	30-45min/session	Not applicable	1998	[37]
	Inpatient	The day before discharge	Breathing techniques	Pursed lips breathing	Not stated	Not stated	Not stated	Not applicable	2014	[39]
	Outpatient	The day before discharge	Breathing techniques	Pursed lips breathing	Not stated	Not stated	Not stated	Not applicable	2014	[39]
	Inpatient	From the second day of admission	Breathing techniques	Airway clearance techniques	Until discharge	1 session/day	Not stated	Not applicable	2012	[40]
	Inpatient	Not stated	Breathing techniques	Deep breathing exercises	≥7 sessions	2 sessions/day	15min/session	Not applicable	2016	[42]
	Inpatient	Since admission	Breathing techniques	Airway clearance techniques	Not stated	Not stated	Not stated	Not applicable	2010	[43]
	Inpatient	Since admission	Breathing techniques	Breathing exercises	Not stated	Not stated	Not stated	Not applicable	2010	[43]
	Inpatient	Not stated	Breathing techniques	ELTGOL	7 days	2 sessions/day	30-40min/session	Not applicable	2009	[48]
	Inpatient	Within 24h of admission	Breathing techniques	Active cycle of breathing technique	1 day	3 sessions/day	3 sets/session	Not applicable	2016	[49]
	Inpatient	Within 24h of admission	Breathing techniques	PEP devices	1 day	3 sessions/day	3 sets/session	10cmH2O	2016	[49]
	Inpatient	Not stated	Breathing techniques	Active cycle of breathing technique	2 weeks	Not stated	30-40min/session	Not applicable	2017	[50]
	Inpatient	Not stated	Breathing techniques	Pursed lips breathing	Until discharge	1 session/day	30-40min/session	Not applicable	2018	[51]
	Inpatient	Not stated	Breathing techniques	Active expiration	Until discharge	1 session/day	30-40min/session	Not applicable	2018	[51]
	Inpatient	From the second day of admission	Breathing techniques	Breathing control	Until discharge	1 session/day	45min/session	Not applicable	2018	[53]
	Inpatient	Within 1h from the beginning of non-invasive positive pressure ventilation	Breathing techniques	Cough	3 days	3 sessions/day	30-40min/session	Not applicable	2002	[54]
	Inpatient	Within 1h from the beginning of non-invasive positive pressure ventilation	Breathing techniques	PEP mask	3 days	3 sessions/day	30-40min/session	10-15cmH2O	2002	[54]
	Inpatient	Since admission	Breathing techniques	Pursed lips breathing	10 days	2 sessions/day	30min/session	Not applicable	2014	[55]
	Inpatient	Since admission	Breathing techniques	Active expiration	10 days	2 sessions/day	30min/session	Not applicable	2014	[55]
	Home	Within 24h of discharge	Breathing techniques	Airway clearance techniques	8 weeks	Not stated	Not stated	Not applicable	2003	[56]
	Inpatient	Within 48h of admission	Breathing techniques	Respiratory physiotherapy	Not stated	Not stated	Not stated	Not applicable	2013	[57]
	Home	At discharge	Education & Psychossocial support	Written action plan for an exacerbation	Not stated	Not stated	Not stated	Not applicable	2016	[18]
	Home	At discharge	Education & Psychossocial support	Self-care support	Not stated	Not stated	Not stated	Not applicable	2016	[18]
	Home	At discharge	Education & Psychossocial support	Self-management	Not stated	Not stated	Not stated	Not applicable	2016	[18]
	Home	At discharge	Education & Psychossocial support	Patient empowerment	Not stated	Not stated	Not stated	Not applicable	2016	[18]
	Home	At discharge	Education & Psychossocial support	Living a Healthy Life with Chronic Conditions	Not stated	Not stated	Not stated	Not applicable	2016	[18]
	Inpatient	At discharge	Education & Psychossocial support	Written action plan for an exacerbation	Not stated	Not stated	Not stated	Not applicable	2016	[18]
	Inpatient	At discharge	Education & Psychossocial support	Self-management	Not stated	Not stated	Not stated	Not applicable	2016	[18]
	Home	At hospital discharge	Education & Psychossocial support	Self-management	Not stated	Not stated	Not stated	Not applicable	2006	[19]
	Home	At hospital discharge	Education & Psychossocial support	Individual care plan	Not stated	Not stated	Not stated	Not applicable	2006	[19]
	Home	At hospital discharge	Education & Psychossocial support	Access to case manager	Not stated	Not stated	Not stated	Not applicable	2006	[19]
	Inpatient	At hospital discharge	Education & Psychossocial support	Self-management	Not stated	Not stated	Not stated	Not applicable	2006	[19]
	Inpatient	At hospital discharge	Education & Psychossocial support	Disease knowledge	Not stated	Not stated	Not stated	Not applicable	2006	[19]
	Inpatient	At hospital discharge	Education & Psychossocial support	Patient empowerment	Not stated	Not stated	Not stated	Not applicable	2006	[19]
	Inpatient	At hospital discharge	Education & Psychossocial support	Medication	Not stated	Not stated	Not stated	Not applicable	2006	[19]
	Inpatient	At hospital discharge	Education & Psychossocial support	Non-pharmacological treatments	Not stated	Not stated	Not stated	Not applicable	2006	[19]
	Inpatient	At hospital discharge	Education & Psychossocial support	Exacerbations	Not stated	Not stated	Not stated	Not applicable	2006	[19]
	Inpatient	Not stated	Education & Psychossocial support	Airway clearance	Not stated	Not stated	Not stated	Not applicable	2012	[20]
	Home	Not stated	Education & Psychossocial support	Self-management Program of Activity, Coping, and Education for COPD	Not stated	Not stated	Not stated	Not applicable	2016	[21]
	Inpatient	Within 48h of admission	Education & Psychossocial support	Airway clearance	Not stated	Not stated	Not stated	Not applicable	2014	[22]
	Inpatient	Within 2 weeks	Education & Psychossocial support	Living well with COPD	3 weeks	Not stated	Not stated	Not applicable	2012	[23]
	Outpatient	Within 2 weeks	Education & Psychossocial support	Living well with COPD	9-12 weeks	Not stated	Not stated	Not applicable	2012	[23]
	Inpatient	Within 24h of clinical stabilization	Education & Psychossocial support	Self-management	3-4 days	3 sessions/week	Not stated	Not applicable	2014	[24]
	Outpatient	Within 24h of clinical stabilization	Education & Psychossocial support	Self-management	3 weeks	3 sessions/week	Not stated	Not applicable	2014	[24]
	Inpatient	From the third day of hospitalization	Education & Psychossocial support	Physical activity	Not stated	1 session/day	Not stated	Not applicable	2014	[26]
	Outpatient	Within 2 weeks of hospital discharge	Education & Psychossocial support	Disease knowledge	12 weeks	Not stated	Not stated	Not applicable	2014	[28]
	Outpatient	Within 2 weeks of hospital discharge	Education & Psychossocial support	Medication	12 weeks	Not stated	Not stated	Not applicable	2014	[28]
	Outpatient	Within 2 weeks of hospital discharge	Education & Psychossocial support	Respiratory physiology	12 weeks	Not stated	Not stated	Not applicable	2014	[28]
	Outpatient	Within 2 weeks of hospital discharge	Education & Psychossocial support	Behaviour modification	12 weeks	Not stated	Not stated	Not applicable	2014	[28]
	Outpatient	Within 2 weeks of hospital discharge	Education & Psychossocial support	Dyspnoea relief and energy conservation techniques	12 weeks	Not stated	Not stated	Not applicable	2014	[28]
	Inpatient	As soon as medical appropriate	Education & Psychossocial support	Physical activity	Not stated	Not stated	Not stated	Not applicable	2009	[29]
	Outpatient	As soon as medical appropriate	Education & Psychossocial support	Medication	8 weeks	2 sessions/week	1h/session	Not applicable	2009	[29]
	Outpatient	As soon as medical appropriate	Education & Psychossocial support	Vaccination	8 weeks	2 sessions/week	1h/session	Not applicable	2009	[29]
	Outpatient	As soon as medical appropriate	Education & Psychossocial support	Airway clearance	8 weeks	2 sessions/week	1h/session	Not applicable	2009	[29]
	Outpatient	As soon as medical appropriate	Education & Psychossocial support	Nutrition	8 weeks	2 sessions/week	1h/session	Not applicable	2009	[29]
	Outpatient	As soon as medical appropriate	Education & Psychossocial support	Self-management	8 weeks	2 sessions/week	1h/session	Not applicable	2009	[29]
	Outpatient	As soon as medical appropriate	Education & Psychossocial support	Symptoms management	8 weeks	2 sessions/week	1h/session	Not applicable	2009	[29]
	Outpatient	As soon as medical appropriate	Education & Psychossocial support	Written action plan for an exacerbation	8 weeks	2 sessions/week	1h/session	Not applicable	2009	[29]
	Outpatient	As soon as medical appropriate	Education & Psychossocial support	End-of-life issues	8 weeks	2 sessions/week	1h/session	Not applicable	2009	[29]
	Outpatient	As soon as medical appropriate	Education & Psychossocial support	Physical activity	8 weeks	2 sessions/week	1h/session	Not applicable	2009	[29]
	Outpatient	As soon as medical appropriate	Education & Psychossocial support	Living with a chronic illness	8 weeks	2 sessions/week	1h/session	Not applicable	2009	[29]
	Inpatient	From the second day of admission	Education & Psychossocial support	Exacerbations	Until discharge	2 sessions/day	30min/session	Not applicable	2015	[31]
	Inpatient	From the second day of admission	Education & Psychossocial support	Physical activity	Until discharge	2 sessions/day	30min/session	Not applicable	2015	[31]
	Inpatient	From the second day of admission	Education & Psychossocial support	Energy conservation techniques	Until discharge	2 sessions/day	30min/session	Not applicable	2015	[31]
	Inpatient	Not stated	Education & Psychossocial support	Disease knowledge	4 days	2 sessions/day	1h/session	Not applicable	2015	[34]
	Inpatient	Not stated	Education & Psychossocial support	Exacerbations	4 days	2 sessions/day	1h/session	Not applicable	2015	[34]
	Inpatient	Not stated	Education & Psychossocial support	Airway clearance	4 days	2 sessions/day	1h/session	Not applicable	2015	[34]
	Inpatient	Not stated	Education & Psychossocial support	Nutrition	4 days	2 sessions/day	1h/session	Not applicable	2015	[34]
	Inpatient	Not stated	Education & Psychossocial support	Smoking cessation	4 days	2 sessions/day	1h/session	Not applicable	2015	[34]
	Community	Within 10 days of hospital discharge	Education & Psychossocial support	Self-management	8 weeks	2 sessions/week	2h/session	Not applicable	2004	[35]
	Community	Within 10 days of hospital discharge	Education & Psychossocial support	Nutrition	8 weeks	2 sessions/week	2h/session	Not applicable	2004	[35]
	Community	Within 10 days of hospital discharge	Education & Psychossocial support	Lifestyle	8 weeks	2 sessions/week	2h/session	Not applicable	2004	[35]
	Outpatient	Within 1 week of hospital discharge	Education & Psychossocial support	Disease knowledge	8 weeks	2 sessions/week	2h/session	Not applicable	2010	[38]
	Home	The day before discharge	Education & Psychossocial support	Self-care support	Not stated	Not stated	Not stated	Not applicable	2014	[39]
	Inpatient	The day before discharge	Education & Psychossocial support	Medication	Not stated	Not stated	Not stated	Not applicable	2014	[39]
	Inpatient	The day before discharge	Education & Psychossocial support	Self-management	Not stated	Not stated	Not stated	Not applicable	2014	[39]
	Inpatient	The day before discharge	Education & Psychossocial support	Exercise programme	Not stated	Not stated	Not stated	Not applicable	2014	[39]
	Inpatient	The day before discharge	Education & Psychossocial support	Symptoms management	Not stated	Not stated	Not stated	Not applicable	2014	[39]
	Outpatient	The day before discharge	Education & Psychossocial support	Medication	Not stated	Not stated	Not stated	Not applicable	2014	[39]
	Outpatient	The day before discharge	Education & Psychossocial support	Symptoms management	Not stated	Not stated	Not stated	Not applicable	2014	[39]
	Outpatient	The day before discharge	Education & Psychossocial support	Self-management	Not stated	Not stated	Not stated	Not applicable	2014	[39]
	Outpatient	The day before discharge	Education & Psychossocial support	Exercise programme	Not stated	Not stated	Not stated	Not applicable	2014	[39]
	Outpatient	Within 2 weeks of hospital discharge	Education & Psychossocial support	Airway clearance	7 weeks	1 session/week	1h/session	Not applicable	2020	[44]
	Community	Within 2 weeks of hospital discharge	Education & Psychossocial support	Airway clearance	7 weeks	1 session/week	1h/session	Not applicable	2020	[44]
	Outpatient	Within 2 weeks of hospital discharge	Education & Psychossocial support	Disease knowledge	7 weeks	1 session/week	1h/session	Not applicable	2020	[44]
	Community	Within 2 weeks of hospital discharge	Education & Psychossocial support	Disease knowledge	7 weeks	1 session/week	1h/session	Not applicable	2020	[44]
	Outpatient	Within 2 weeks of hospital discharge	Education & Psychossocial support	Exercise programme	7 weeks	1 session/week	1h/session	Not applicable	2020	[44]
	Community	Within 2 weeks of hospital discharge	Education & Psychossocial support	Exercise programme	7 weeks	1 session/week	1h/session	Not applicable	2020	[44]
	Outpatient	Within 2 weeks of hospital discharge	Education & Psychossocial support	Medication	7 weeks	1 session/week	1h/session	Not applicable	2020	[44]
	Community	Within 2 weeks of hospital discharge	Education & Psychossocial support	Medication	7 weeks	1 session/week	1h/session	Not applicable	2020	[44]
	Outpatient	Within 2 weeks of hospital discharge	Education & Psychossocial support	Nutrition	7 weeks	1 session/week	1h/session	Not applicable	2020	[44]
	Community	Within 2 weeks of hospital discharge	Education & Psychossocial support	Nutrition	7 weeks	1 session/week	1h/session	Not applicable	2020	[44]
	Outpatient	Within 2 weeks of hospital discharge	Education & Psychossocial support	Self-management	7 weeks	1 session/week	1h/session	Not applicable	2020	[44]
	Community	Within 2 weeks of hospital discharge	Education & Psychossocial support	Self-management	7 weeks	1 session/week	1h/session	Not applicable	2020	[44]
	Outpatient	Within 2 weeks of hospital discharge	Education & Psychossocial support	Smoking cessation	7 weeks	1 session/week	1h/session	Not applicable	2020	[44]
	Community	Within 2 weeks of hospital discharge	Education & Psychossocial support	Smoking cessation	7 weeks	1 session/week	1h/session	Not applicable	2020	[44]
	Outpatient	Within 2 weeks of hospital discharge	Education & Psychossocial support	Symptoms management	7 weeks	1 session/week	1h/session	Not applicable	2020	[44]
	Community	Within 2 weeks of hospital discharge	Education & Psychossocial support	Symptoms management	7 weeks	1 session/week	1h/session	Not applicable	2020	[44]
	Inpatient	From the second day of admission	Education & Psychossocial support	Self-management	Until discharge	1 session/day	Not stated	Not applicable	2019	[46]
	Inpatient	From the second day of admission	Education & Psychossocial support	Disease knowledge	Until discharge	1 session/day	Not stated	Not applicable	2019	[46]
	Inpatient	From the second day of admission	Education & Psychossocial support	Lifestyle	Until discharge	1 session/day	Not stated	Not applicable	2019	[46]
	Inpatient	From the second day of admission	Education & Psychossocial support	Symptoms management	Until discharge	1 session/day	Not stated	Not applicable	2019	[46]
	Home	At hospital discharge	Education & Psychossocial support	Self-management	Not stated	Not stated	Not stated	Not applicable	2007	[47]
	Home	At hospital discharge	Education & Psychossocial support	Individual care plan	Not stated	Not stated	Not stated	Not applicable	2007	[47]
	Home	At hospital discharge	Education & Psychossocial support	Access to case manager	Not stated	Not stated	Not stated	Not applicable	2007	[47]
	Inpatient	At hospital discharge	Education & Psychossocial support	Self-management	Not stated	Not stated	Not stated	Not applicable	2007	[47]
	Inpatient	At hospital discharge	Education & Psychossocial support	Disease knowledge	Not stated	Not stated	Not stated	Not applicable	2007	[47]
	Inpatient	At hospital discharge	Education & Psychossocial support	Smoking cessation	Not stated	Not stated	Not stated	Not applicable	2007	[47]
	Inpatient	At hospital discharge	Education & Psychossocial support	Nutrition	Not stated	Not stated	Not stated	Not applicable	2007	[47]
	Inpatient	At hospital discharge	Education & Psychossocial support	Medication	Not stated	Not stated	Not stated	Not applicable	2007	[47]
	Inpatient	At hospital discharge	Education & Psychossocial support	Non-pharmacological treatments	Not stated	Not stated	Not stated	Not applicable	2007	[47]
	Inpatient	At hospital discharge	Education & Psychossocial support	Physical activity	Not stated	Not stated	Not stated	Not applicable	2007	[47]
	Inpatient	At hospital discharge	Education & Psychossocial support	Exacerbations	Not stated	Not stated	Not stated	Not applicable	2007	[47]
	Inpatient	Within 24h of admission	Education & Psychossocial support	Airway clearance	Not stated	Not stated	Not stated	Not applicable	2016	[49]
	Inpatient	Within 24h of admission	Education & Psychossocial support	Medication	Not stated	Not stated	Not stated	Not applicable	2016	[49]
	Inpatient	Within 24h of admission	Education & Psychossocial support	Physical activity	Not stated	Not stated	Not stated	Not applicable	2016	[49]
	Inpatient	Not stated	Education & Psychossocial support	Smoking cessation	2 weeks	Not stated	30-40min/session	Not applicable	2017	[50]
	Inpatient	Not stated	Education & Psychossocial support	Lifestyle	2 weeks	Not stated	30-40min/session	Not applicable	2017	[50]
	Home	Within 24h of discharge	Education & Psychossocial support	Disease knowledge	8 weeks	Not stated	Not stated	Not applicable	2003	[56]
	Home	Within 24h of discharge	Education & Psychossocial support	Smoking cessation	8 weeks	Not stated	Not stated	Not applicable	2003	[56]
	Home	Within 24h of discharge	Education & Psychossocial support	Patient empowerment	8 weeks	Not stated	Not stated	Not applicable	2003	[56]
	Home	Within 24h of discharge	Education & Psychossocial support	Nutrition	8 weeks	Not stated	Not stated	Not applicable	2003	[56]
	Home	Within 24h of discharge	Education & Psychossocial support	Lifestyle	8 weeks	Not stated	Not stated	Not applicable	2003	[56]
	Home	Within 24h of discharge	Education & Psychossocial support	Exacerbations	8 weeks	Not stated	Not stated	Not applicable	2003	[56]
	Home	Within 48h of admission	Education & Psychossocial support	Discharge plan	Not stated	Not stated	Not stated	Not applicable	2013	[57]
	Home	Within 48h of admission	Education & Psychossocial support	Discharge coordinator	Not stated	Not stated	Not stated	Not applicable	2013	[57]
	Inpatient	Within 48h of admission	Education & Psychossocial support	Disease knowledge	Not stated	Not stated	Not stated	Not applicable	2013	[57]
	Inpatient	Within 48h of admission	Education & Psychossocial support	Medication	Not stated	Not stated	Not stated	Not applicable	2013	[57]
	Inpatient	Not stated	Education & Psychossocial support	Discharge plan	Not stated	Not stated	Not stated	Not applicable	2019	[58]
	Inpatient	Not stated	Education & Psychossocial support	Individual care plan	Not stated	Not stated	Not stated	Not applicable	2019	[58]
	Inpatient	Not stated	Education & Psychossocial support	Self-management	Not stated	Not stated	Not stated	Not applicable	2019	[58]
	Inpatient	Not stated	Education & Psychossocial support	Self-care support	Not stated	Not stated	Not stated	Not applicable	2019	[58]
	Home	Not stated	Education & Psychossocial support	Discharge plan	Not stated	Not stated	Not stated	Not applicable	2019	[58]
	Home	Not stated	Education & Psychossocial support	Individual care plan	Not stated	Not stated	Not stated	Not applicable	2019	[58]
	Home	Not stated	Education & Psychossocial support	Self-management	Not stated	Not stated	Not stated	Not applicable	2019	[58]
	Home	Not stated	Education & Psychossocial support	Self-care support	Not stated	Not stated	Not stated	Not applicable	2019	[58]
	Inpatient	Within 7 days of hospital admission	Education & Psychossocial support	Disease knowledge	2 weeks	2 sessions	30min/session	Not applicable	2018	[59]
	Inpatient	Within 7 days of hospital admission	Education & Psychossocial support	Exacerbations	2 weeks	2 sessions	30min/session	Not applicable	2018	[59]
	Inpatient	Within 7 days of hospital admission	Education & Psychossocial support	Medication	2 weeks	2 sessions	30min/session	Not applicable	2018	[59]
	Inpatient	Within 7 days of hospital admission	Education & Psychossocial support	Physical activity	2 weeks	2 sessions	30min/session	Not applicable	2018	[59]
	Inpatient	Within 7 days of hospital admission	Education & Psychossocial support	Pulmonary rehabilitation	2 weeks	2 sessions	30min/session	Not applicable	2018	[59]
	Inpatient	Within 7 days of hospital admission	Education & Psychossocial support	Respiratory physiology	2 weeks	2 sessions	30min/session	Not applicable	2018	[59]
	Inpatient	Within 7 days of hospital admission	Education & Psychossocial support	Smoking cessation	2 weeks	2 sessions	30min/session	Not applicable	2018	[59]
	Inpatient	Within 7 days of hospital admission	Education & Psychossocial support	Symptoms management	2 weeks	2 sessions	30min/session	Not applicable	2018	[59]
	Home	Within 7 days of hospital admission	Education & Psychossocial support	Disease knowledge	2 weeks	2 sessions	30min/session	Not applicable	2018	[59]
	Home	Within 7 days of hospital admission	Education & Psychossocial support	Exacerbations	2 weeks	2 sessions	30min/session	Not applicable	2018	[59]
	Home	Within 7 days of hospital admission	Education & Psychossocial support	Medication	2 weeks	2 sessions	30min/session	Not applicable	2018	[59]
	Home	Within 7 days of hospital admission	Education & Psychossocial support	Physical activity	2 weeks	2 sessions	30min/session	Not applicable	2018	[59]
	Home	Within 7 days of hospital admission	Education & Psychossocial support	Pulmonary rehabilitation	2 weeks	2 sessions	30min/session	Not applicable	2018	[59]
	Home	Within 7 days of hospital admission	Education & Psychossocial support	Respiratory physiology	2 weeks	2 sessions	30min/session	Not applicable	2018	[59]
	Home	Within 7 days of hospital admission	Education & Psychossocial support	Smoking cessation	2 weeks	2 sessions	30min/session	Not applicable	2018	[59]
	Home	Within 7 days of hospital admission	Education & Psychossocial support	Symptoms management	2 weeks	2 sessions	30min/session	Not applicable	2018	[59]
	Home	At discharge	Strength training	Upper limbs	Not stated	Not stated	Not stated	Not stated	2016	[18]
	Home	Not stated	Strength training	Upper and lower limbs	Not stated	3 sessions/week	Not stated	Not stated	2016	[21]
	Inpatient	Within 2 weeks	Strength training	Not stated	3 weeks	Not stated	Not stated	Not stated	2012	[23]
	Outpatient	Within 2 weeks	Strength training	Not stated	9-12 weeks	Not stated	Not stated	Not stated	2012	[23]
	Inpatient	Within 24h of clinical stabilization	Strength training	Upper and lower limbs	3-4 days	3 sessions/week	20min/session	70-80% of 1RM	2014	[24]
	Outpatient	Within 24h of clinical stabilization	Strength training	Upper and lower limbs	3 weeks	3 sessions/week	20min/session	70-80% of 1RM	2014	[24]
	Inpatient	From the third day of hospitalization	Strength training	Upper and lower limbs	Not stated	1 session/day	Not stated	≥80% of 1RM; Symptoms <7 at modified Borg	2014	[26]
	Outpatient	Within 2 weeks of hospital discharge	Strength training	Upper and lower limbs	12 weeks	Not stated	Not stated	Not stated	2014	[28]
	Inpatient	As soon as medical appropriate	Strength training	Upper and lower limbs	Until discharge	1 session/day	≥30min/day	Not stated	2009	[29]
	Outpatient	As soon as medical appropriate	Strength training	Upper and lower limbs	8 weeks	2 sessions/week	1h/session	Not stated	2009	[29]
	Inpatient	From the second day of admission	Strength training	Not stated	Until discharge	2 sessions/day	30min/session	Dyspnoea between 3-5 at modified Borg	2015	[31]
	Outpatient	2-3weeks after discharge	Strength training	Upper and lower limbs	Not stated	Not stated	Not stated	Not stated	2011	[33]
	Inpatient	Not stated	Strength training	Upper limbs	4 days	2 sessions/day	1h/session	Not stated	2015	[34]
	Community	Within 10 days of hospital discharge	Strength training	Upper and lower limbs	8 weeks	2 sessions/week	2h/session	Not stated	2004	[35]
	Home	From discharge	Strength training	Upper limbs	6 weeks	2 sessions/week	30-40min/session	Symptoms between 3-5 at modified Borg	2005	[36]
	Inpatient	3-5 days after admission	Strength training	Lower limbs	Until discharge	2 sessions/day	30-45min/session	Not stated	1998	[37]
	Outpatient	Within 1 week of hospital discharge	Strength training	Upper and lower limbs	8 weeks	2 sessions/week	2h/session	Not stated	2010	[38]
	Inpatient	From the second day of admission	Strength training	Upper and lower limbs	Until discharge	2 sessions/day	15min/session	40% or 70% of 1RM	2012	[40]
	Inpatient	Not stated	Strength training	Upper and lower limbs	≥7 sessions	2 sessions/day	20-30min/session	Not stated	2016	[42]
	Inpatient	Since admission	Strength training	Lower limbs	7 days	1 session/day	3 sets of 8 repetitions	70% of 1RM	2010	[43]
	Outpatient	Within 2 weeks of hospital discharge	Strength training	Upper and lower limbs	7 weeks	2 sessions/week	30min/session	40-80% of 1RM	2020	[44]
	Community	Within 2 weeks of hospital discharge	Strength training	Upper and lower limbs	7 weeks	2 sessions/week	30min/session	40-80% of 1RM	2020	[44]
	Home	Within 2 weeks of hospital discharge	Strength training	Upper and lower limbs	7 weeks	2 sessions/week	30min/session	Body weight	2020	[44]
	Inpatient	From the second day of admission	Strength training	Lower limbs	Until discharge	1 session/day	Not stated	Not stated	2019	[46]
	Inpatient	Not stated	Strength training	Upper and lower limbs	Until discharge	1 session/day	30-40min/session	Not stated	2018	[51]
	Inpatient	From the second day of admission	Strength training	Lower limbs	Until discharge	1 session/day	45min/session	Not stated	2018	[53]
	Home	Within 24h of discharge	Strength training	Upper and lower limbs	8 weeks	Not stated	Not stated	Not stated	2003	[56]

## Sheet: Outcomes
	7. List of all the outcomes and outcome measures used to assess the effectiveness of the interventions and respective effect sizes.
	Study references in which each outcome and outcome measure was used are also presented. Please refer to "Tab. 8 - References" for the reference list.
	Setting	Outcome	Outcome measure	Effect size	Year of publication	Reference
	Inpatient and Home	Hospital readmission	% of patients readmited	[0.1; 0.6]	2016	[18]
	Inpatient and Home	HRQoL	Chronic respiratory questionnaire	0.4	2016	[18]
	Inpatient and Home	Mortality	Number (%) of patients that died	0.8	2016	[18]
	Inpatient and Home	Hospital readmission	Number of readmissions	0.6	2006	[19]
	Inpatient and Home	Mortality	Number (%) of patients that died	1.2	2006	[19]
	Inpatient	HRQoL	St. George’s respiratory questionnaire	0.0	2012	[20]
	Inpatient	HRQoL	EuroQol	0.0	2012	[20]
	Inpatient	Length of hospitalization	Number of days	⎼0.1	2012	[20]
	Inpatient	Symptoms	Breathlessness, cough and sputum scale	0.0	2012	[20]
	Home	Disease knowledge	Bristol COPD knowledge questionnaire	0.3	2016	[21]
	Home	Exercise capacity	Incremental shuttle walk test	Not possible to calculate	2016	[21]
	Home	Exercise capacity	Endurance shuttle walk test	Not possible to calculate	2016	[21]
	Home	Hospital readmission	Number (%) of patients readmited	0.9	2016	[21]
	Home	HRQoL	Chronic respiratory questionnaire	[0.3; 0.5]	2016	[21]
	Home	Mortality	Number (%) of patients that died	0.1	2016	[21]
	Home	Self-efficacy	Pulmonary Rehabilitation Adapted Index of Self-Efficacy	⎼0.2	2016	[21]
	Home	Symptoms: Anxiety	Hospital anxiety and depression scale	⎼0.2	2016	[21]
	Home	Symptoms: Depression	Hospital anxiety and depression scale	⎼0.1	2016	[21]
	Inpatient	Disease severity	BODE index	⎼0.8	2014	[22]
	Inpatient	Exercise capacity	6-minute walk test	2.3	2014	[22]
	Inpatient	Hospital readmission	Number of readmissions	Not possible to calculate	2014	[22]
	Inpatient	HRQoL	St. George’s respiratory questionnaire	[⎼0.3; 0.4]	2014	[22]
	Inpatient	Length of hospitalization	Number of days	Not possible to calculate	2014	[22]
	Inpatient	Lung function	Forced expiratory volume in one second	0.5	2014	[22]
	Inpatient	Mortality	Number (%) of patients that died	0.6	2014	[22]
	Inpatient	Symptoms	Breathlessness, cough and sputum scale	0.1	2014	[22]
	Inpatient	Symptoms: Dyspnoea	modified Medical Research Council dyspnoea questionnaire	⎼4-0	2014	[22]
	Inpatient and Outpatient	HRQoL	Chronic respiratory questionnaire	Not possible to calculate	2012	[23]
	Inpatient and Outpatient	HRQoL	Feeling thermometer	Not possible to calculate	2012	[23]
	Inpatient and Outpatient	New exacerbations	Number of exacerbations	1.0	2012	[23]
	Inpatient and Outpatient	Symptoms: Dyspnoea	modified Medical Research Council dyspnoea questionnaire	Not possible to calculate	2012	[23]
	Inpatient and Outpatient	Exercise capacity	6-minute walk test	0.6	2014	[24]
	Inpatient and Outpatient	Exercise capacity	Peak oxygen uptake	0.5	2014	[24]
	Inpatient and Outpatient	HRQoL	The 36-item short form health survey	[0.5; 2.1]	2014	[24]
	Inpatient and Outpatient	Lung function	Forced expiratory volume in one second	[0.2; 0.4]	2014	[24]
	Inpatient and Outpatient	Lung function	Forced vital capacity	[0.2; 0.3]	2014	[24]
	Inpatient and Outpatient	Lung function	FEV1/FVC ratio	0.5	2014	[24]
	Inpatient and Outpatient	Symptoms: Dyspnoea	modified Borg scale	0.2	2014	[24]
	Inpatient and Outpatient	Vital signs & SpO2	Peripheral oxygen saturation	0.7	2014	[24]
	Inpatient	Exercise capacity	6-minute walk test	0.9	2010	[25]
	Inpatient	Length of hospitalization	Number of days	⎼0.3	2010	[25]
	Inpatient	Lung function	Peak expiratory flow	1.4	2010	[25]
	Inpatient	Lung function	Sustained maximal inspiration	0.7	2010	[25]
	Inpatient	Symptoms: Dyspnoea	New York Heart Association functional grade	⎼0.5	2010	[25]
	Inpatient	Symptoms: Perceived exertion	Borg scale	Not possible to calculate	2010	[25]
	Inpatient	Exercise capacity	6-minute walk test	2.1	2014	[26]
	Inpatient	HRQoL	St. George’s respiratory questionnaire	[⎼0.5; 0.5]	2014	[26]
	Inpatient	Length of hospitalization	Number of days	⎼0.6	2014	[26]
	Inpatient	Lung function	Forced expiratory volume in one second	0.0	2014	[26]
	Inpatient	Muscle strength	Upper limb	Not possible to calculate	2014	[26]
	Inpatient	Muscle strength	Lower limb	Not possible to calculate	2014	[26]
	Inpatient	Physical activity levels	Monitor movement	2.6	2014	[26]
	Inpatient	Exercise capacity	Endurance shuttle walk test	⎼0.4	2013	[27]
	Inpatient	Muscle strength	Quadriceps maximal voluntary contraction	0.0	2013	[27]
	Outpatient	Exercise capacity	6-minute walk test	0.7	2014	[28]
	Outpatient	HRQoL	St. George’s respiratory questionnaire	[⎼1.2; ⎼0.8]	2014	[28]
	Outpatient	Symptoms: Dyspnoea	modified Medical Research Council dyspnoea questionnaire	Not possible to calculate	2014	[28]
	Inpatient and Outpatient	Disease severity	BODE index	⎼0.3	2009	[29]
	Inpatient and Outpatient	Exercise capacity	6-minute walk test	0.1	2009	[29]
	Inpatient and Outpatient	Hospital readmission	Risk of readmission	Not possible to calculate	2009	[29]
	Inpatient and Outpatient	HRQoL	Chronic respiratory questionnaire	[0.1; 0.6]	2009	[29]
	Inpatient and Outpatient	HRQoL	The 36-item short form health survey	[0.2; 0.7]	2009	[29]
	Inpatient and Outpatient	Symptoms: Anxiety	Hospital anxiety and depression scale	⎼0.4	2009	[29]
	Inpatient and Outpatient	Symptoms: Depression	Hospital anxiety and depression scale	⎼0.1	2009	[29]
	Inpatient and Outpatient	Symptoms: Dyspnoea	modified Borg scale	0.2	2009	[29]
	Inpatient and Outpatient	Symptoms: Dyspnoea	modified Medical Research Council dyspnoea questionnaire	⎼0.2	2009	[29]
	Inpatient and Outpatient	Vital signs & SpO2	Peripheral oxygen saturation	0.1	2009	[29]
	Inpatient	Exercise capacity	6-minute walk test	0.8	2014	[30]
	Inpatient	Exercise capacity	Chair rising test	⎼0.7	2014	[30]
	Inpatient	HRQoL	St. George’s respiratory questionnaire	⎼0.5	2014	[30]
	Inpatient	Impact of disease	COPD assessment test	⎼0.3	2014	[30]
	Inpatient	Length of hospitalization	Number of days	0.0	2014	[30]
	Inpatient	Lung function	Forced expiratory volume in one second	⎼0.1	2014	[30]
	Inpatient	Disease severity	BODE index	⎼4.7	2015	[31]
	Inpatient	Exercise capacity	6-minute walk test	2.3	2015	[31]
	Inpatient	Functionality	Activity of Daily Living Dyspnoea scale	6.8	2015	[31]
	Inpatient	HRQoL	Chronic respiratory questionnaire	6.1	2015	[31]
	Inpatient	Impact of disease	COPD assessment test	⎼5.1	2015	[31]
	Inpatient	Symptoms: Dyspnoea	modified Borg scale	[⎼0.7; ⎼0.5]	2015	[31]
	Inpatient	Symptoms: Dyspnoea	modified Medical Research Council dyspnoea questionnaire	⎼1.1	2015	[31]
	Inpatient	Vital signs & SpO2	Peripheral oxygen saturation	[-0.4; 3.4]	2015	[31]
	Inpatient	Exercise capacity	6-minute walk test	5.0	1998	[32]
	Inpatient	Exercise capacity	Oxygen uptake	⎼1.8	1998	[32]
	Inpatient	Lung function	Forced expiratory volume in one second	1.1	1998	[32]
	Inpatient	Lung function	Inspiratory capacity	0.6	1998	[32]
	Inpatient	Symptoms: Dyspnoea	modified Borg scale	⎼3.1	1998	[32]
	Inpatient	Symptoms: Dyspnoea	Transition Dyspnoea Index	Not possible to calculate	1998	[32]
	Inpatient	Vital signs & SpO2	Heart rate	⎼3.1	1998	[32]
	Inpatient	Vital signs & SpO2	Respiratory rate	⎼0.8	1998	[32]
	Outpatient	Exercise capacity	6-minute walk test	0.2	2011	[33]
	Outpatient	Exercise capacity	Maximum oxygen uptake	⎼0.2	2011	[33]
	Outpatient	Hospital readmission	Number of readmissions	1.0	2011	[33]
	Outpatient	HRQoL	St. George’s respiratory questionnaire	[⎼0.8; ⎼0.1]	2011	[33]
	Outpatient	HRQoL	The 36-item short form health survey	[⎼0.1; 0.6]	2011	[33]
	Outpatient	Lung function	Forced expiratory volume in one second	0.0	2011	[33]
	Outpatient	New exacerbations	Number of exacerbations	0.9	2011	[33]
	Outpatient	Symptoms: Dyspnoea	modified Borg scale	⎼0.1	2011	[33]
	Outpatient	Symptoms: Dyspnoea	modified Medical Research Council dyspnoea questionnaire	⎼0.2	2011	[33]
	Inpatient	Exercise capacity	6-minute walk test	0.6	2015	[34]
	Inpatient	Symptoms: Cough	Visual Analog Scale	⎼1.0	2015	[34]
	Inpatient	Symptoms: Dyspnoea	modified Borg scale	⎼1.1	2015	[34]
	Inpatient	Symptoms: Sputum	Difficulty to expectorate	4.43	2015	[34]
	Community	Exercise capacity	Incremental shuttle walk test	Not possible to calculate	2004	[35]
	Community	Hospital readmission	% of patients readmited	0.4	2004	[35]
	Community	HRQoL	St. George’s respiratory questionnaire	[⎼-1.0; ⎼0.2]	2004	[35]
	Community	HRQoL	Chronic respiratory questionnaire	[0.9; 1.2]	2004	[35]
	Community	HRQoL	The 36-item short form health survey	[0.5; 0.9]	2004	[35]
	Home	Exercise capacity	Incremental shuttle walk test	0.6	2005	[36]
	Home	Exercise capacity	3-minute step test	1.0	2005	[36]
	Home	HRQoL	St. George’s respiratory questionnaire	[⎼0.8; 0.6]	2005	[36]
	Home	HRQoL	EuroQol	[0.5; 0.9]	2005	[36]
	Home	Muscle strength	Handgrip	Not possible to calculate	2005	[36]
	Home	Muscle strength	Knee extension	Not possible to calculate	2005	[35]
	Home	New exacerbations	Number of patients that exacerbate	0.3	2005	[36]
	Home	Symptoms: Dyspnoea	modified Borg scale	0.6	2005	[36]
	Home	Symptoms: Dyspnoea	Medical Research Council dyspnoea questionnaire	⎼0.3	2005	[36]
	Home	Vital signs & SpO2	Heart rate	[⎼0.2; 0.7]	2005	[36]
	Home	Vital signs & SpO2	Peripheral oxygen saturation	[0.4; 0.6]	2005	[36]
	Inpatient	Exercise capacity	6-minute walk test	Not possible to calculate	1998	[37]
	Inpatient	Length of hospitalization	Number of days	0.4	1998	[37]
	Inpatient	Lung function	Forced expiratory volume in one second	0.0	1998	[37]
	Inpatient	Mortality	Number (%) of patients that died	1.0	1998	[37]
	Inpatient	Muscle strength	Maximal inspiratory pressure	1.2	1998	[37]
	Inpatient	Symptoms: Dyspnoea	Visual Analog Scale	Not possible to calculate	1998	[37]
	Inpatient	Vital signs & SpO2	Heart rate	0.1	1998	[37]
	Outpatient	Exercise capacity	Incremental shuttle walk test	0.5	2010	[38]
	Outpatient	Exercise capacity	Endurance shuttle walk test	0.6	2010	[38]
	Outpatient	Hospital readmission	Number (%) of patients readmited	0.2	2010	[38]
	Outpatient	HRQoL	St. George’s respiratory questionnaire	[⎼0-8; ⎼0.2]	2010	[38]
	Outpatient	HRQoL	Chronic respiratory questionnaire	[0.1; 0.7]	2010	[38]
	Outpatient	HRQoL	EuroQol	0.2	2010	[38]
	Outpatient	Muscle strength	Quadriceps maximal voluntary contraction	0.5	2010	[38]
	Outpatient	New exacerbations	Number (%) of patients that exacerbate	0.3	2010	[38]
	Inpatient, Outpatient and Home	Exercise capacity	6-minute walk test	0.1	2014	[39]
	Inpatient, Outpatient and Home	HRQoL	St. George’s respiratory questionnaire	[⎼1.2; ⎼0.3]	2014	[39]
	Inpatient, Outpatient and Home	Lung function	Peak expiratory flow	0.0	2014	[39]
	Inpatient, Outpatient and Home	Vital signs & SpO2	Heart rate	0.0	2014	[39]
	Inpatient, Outpatient and Home	Vital signs & SpO2	Peripheral oxygen saturation	0.0	2014	[39]
	Inpatient	Exercise capacity	3-minute walk test	[0.4; 0.6]	2012	[40]
	Inpatient	Functionality	Barthel index	Not possible to calculate	2012	[40]
	Inpatient	Length of hospitalization	Number of days	⎼0.3	2012	[40]
	Inpatient	Lung function	Forced expiratory volume in one second	Not possible to calculate	2012	[40]
	Inpatient	Muscle strength	Upper limb	[0.2; 0.6]	2012	[40]
	Inpatient	Exercise capacity	30-seconds sit-to-stand test	1.1	2017	[41]
	Inpatient	Functionality	One-leg stance test	[1.2; 1.3]	2017	[41]
	Inpatient	Length of hospitalization	Number of days	0.9	2017	[41]
	Inpatient	Muscle strength	Lower limb	0.9	2017	[41]
	Inpatient	Physical activity levels	Number of steps/day	2.4	2017	[41]
	Inpatient	Exercise capacity	2-minute step in place test	1.0	2016	[42]
	Inpatient	HRQoL	EuroQol	[0.0; 0.6]	2016	[42]
	Inpatient	Length of hospitalization	Number of days	⎼0.1	2016	[42]
	Inpatient	Lung function	Forced expiratory volume in one second	[⎼3.0; 0.4]	2016	[42]
	Inpatient	Muscle strength	Handgrip	0.6	2016	[42]
	Inpatient	Muscle strength	Lower limb	1.5	2016	[42]
	Inpatient	Symptoms: Anxiety	Hospital anxiety and depression scale	0.9	2016	[42]
	Inpatient	Symptoms: Depression	Hospital anxiety and depression scale	1.3	2016	[42]
	Inpatient	Symptoms: Dyspnoea	modified Borg scale	⎼0.6	2016	[42]
	Inpatient	Vital signs & SpO2	Peripheral oxygen saturation	2.1	2016	[42]
	Inpatient	Exercise capacity	6-minute walk test	Not possible to calculate	2010	[43]
	Inpatient	Hospital readmission	Number of patients readmited	1.5	2010	[43]
	Inpatient	Length of hospitalization	Number of days	Not possible to calculate	2010	[43]
	Inpatient	Muscle strength	Quadriceps maximal voluntary contraction	0.7	2010	[43]
	Outpatient, Community, Home	Exercise capacity	Incremental shuttle walk test	[1.8; 3.6]	2020	[44]
	Outpatient, Community, Home	Exercise capacity	Endurance shuttle walk test	[0.5; 3.1]	2020	[44]
	Outpatient, Community, Home	Impact of disease	COPD assessment test	-2.3	2020	[44]
	Outpatient, Community, Home	Hospital readmission	Number of readmissions	[0.7; 1.0]	2020	[44]
	Outpatient, Community, Home	Mortality	Number (%) of patients that died	1.1	2020	[44]
	Inpatient	Muscle strength	Knee extension	[-0.5; 0.9]	2019	[45]
	Inpatient	Functionality	5-times sit-to-stand	[-0.5; 0.7]	2019	[45]
	Inpatient	Symptoms: Dyspnoea	modified Borg scale	[-0.4; 0.4]	2019	[45]
	Inpatient	Symptoms: Perceived exertion	Visual Analog Scale	[-1.1; 1.0]	2019	[45]
	Inpatient	Length of hospitalization	Number of days	[-0.4; 0.0]	2019	[45]
	Inpatient	Muscle strength	Handgrip	[0.0; 0.1]	2019	[46]
	Inpatient	Lung function	Forced expiratory volume in one second	0.0	2019	[46]
	Inpatient	Functionality	5-times sit-to-stand	[-0.2; 0.1]	2019	[46]
	Inpatient	Functionality	London Chest Activity of Daily Living	[-0.5; 0.1]	2019	[46]
	Inpatient	Functionality	Functional Independence Measure	[-0.1; 0.9]	2019	[46]
	Inpatient	Symptoms: Dyspnoea	modified Borg scale	[-0.4; 0.5]	2019	[46]
	Inpatient	HRQoL	EuroQol	[-0.7; 0.4]	2019	[46]
	Inpatient	Length of hospitalization	Number of days	0.0	2019	[46]
	Inpatient and Home	Disease knowledge	Study Specific Questionnaire/Survey	[1.4; 15.1]	2007	[47]
	Inpatient and Home	Hospital readmission	Number of readmissions	Not possible to calculate	2007	[47]
	Inpatient and Home	HRQoL	St. George’s respiratory questionnaire	[⎼0.3; 0.2]	2007	[47]
	Inpatient and Home	HRQoL	EuroQol	0.3	2007	[47]
	Inpatient and Home	Lung function	Forced expiratory volume in one second	⎼0.3	2007	[47]
	Inpatient and Home	Lung function	FEV1/FVC ratio	0.1	2007	[47]
	Inpatient and Home	Patients’ satisfaction	Study Specific Questionnaire/Survey	9.3	2007	[47]
	Inpatient and Home	Physical activity levels	Study Specific Questionnaire/Survey	[1.2; 1.7]	2007	[47]
	Inpatient and Home	Symptoms: Dyspnoea	Medical Research Council dyspnoea questionnaire	0.0	2007	[47]
	Inpatient	HRQoL	St. George’s respiratory questionnaire	⎼0.1	2009	[48]
	Inpatient	Length of hospitalization	Number of days	⎼0.2	2009	[48]
	Inpatient	Lung function	Forced expiratory volume in one second	0.1	2009	[48]
	Inpatient	Lung function	FEV1/FVC ratio	0.1	2009	[48]
	Inpatient	Symptoms: Dyspnoea	modified Borg scale	⎼0.9	2009	[48]
	Inpatient	Symptoms: Dyspnoea	Medical Research Council dyspnoea questionnaire	⎼0.2	2009	[48]
	Inpatient	Symptoms: Sputum	Sputum production	⎼0.6	2009	[48]
	Inpatient	Vital signs & SpO2	Peripheral oxygen saturation	0.1	2009	[48]
	Inpatient	Impact of disease	COPD assessment test	[⎼0.9; 0.9]	2016	[49]
	Inpatient	Length of hospitalization	Number of hours	Not possible to calculate	2016	[49]
	Inpatient	Lung function	Forced expiratory volume in one second	[⎼0.6; 0.4]	2016	[49]
	Inpatient	Lung function	Forced vital capacity	[⎼0.7; ⎼0.5]	2016	[49]
	Inpatient	Lung function	FEV1/FVC ratio	[⎼0.7; ⎼0.2]	2016	[49]
	Inpatient	Patients’ satisfaction	Study Specific Questionnaire/Survey	[0.2; 0.5]	2016	[49]
	Inpatient	Symptoms	Breathlessness, cough and sputum scale	[⎼0.1; 1.8]	2016	[49]
	Inpatient	Symptoms – Difficulty to expectorate	Visual Analog Scale	[0.2; 0.6]	2016	[49]
	Inpatient	Lung function	Peak expiratory flow	⎼0.4	2017	[50]
	Inpatient	Vital signs & SpO2	Peripheral oxygen saturation	0.0	2017	[50]
	Inpatient	Symptoms: Dyspnoea	Visual Analog Scale	4.8	2017	[50]
	Inpatient	Lung function	Forced expiratory volume in one second	[0.0; 0.2]	2018	[51]
	Inpatient	Symptoms: Dyspnoea	modified Borg scale	[-0.7; 0.7]	2018	[51]
	Inpatient	HRQoL	EuroQol	[-2.1; 1.0]	2018	[51]
	Inpatient	Length of hospitalization	Number of days	[-0.4; 0.3]	2018	[51]
	Inpatient	Functionality	Barthel index	[⎼0.2; 0.5]	2003	[52]
	Inpatient	Hospital readmission	Number (%) of patients readmited	[0.6; 1.8]	2003	[52]
	Inpatient	Length of hospitalization	Number of days	[0.0; 0.2]	2003	[52]
	Inpatient	Symptoms: Perceived exertion	Borg scale	[⎼0.9; 0.3]	2003	[52]
	Inpatient	Functionality	5-times sit-to-stand	[-0.6; 0.5]	2018	[53]
	Inpatient	Functionality	London Chest Activity of Daily Living	[-1.7; 0.2]	2018	[53]
	Inpatient	Symptoms: Dyspnoea	modified Borg scale	[-0.5; 0.5]	2018	[53]
	Inpatient	Symptoms: Fatigue	Fatigue Severity Scale	[-0.9; 0.9]	2018	[53]
	Inpatient	Length of hospitalization	Number of days	[-0.4; 0.3]	2018	[53]
	Inpatient	Mortality	Number of patients that died	0.3	2002	[54]
	Inpatient	Symptoms: Sputum	Sputum production	1.0	2002	[54]
	Inpatient	HRQoL	EuroQol	[⎼0.9; ⎼3.0]	2014	[55]
	Inpatient	Symptoms: Anxiety	Hospital anxiety and depression scale	⎼0.9	2014	[55]
	Inpatient	Symptoms: Depression	Hospital anxiety and depression scale	⎼1.0	2014	[55]
	Inpatient	Symptoms: Dyspnoea	modified Medical Research Council dyspnoea questionnaire	⎼1.0	2014	[55]
	Home	Disease knowledge	Study Specific Questionnaire/Survey	3.8	2003	[56]
	Home	Hospital readmission	Number (%) of patients readmited	0.7	2003	[56]
	Home	HRQoL	St. George’s respiratory questionnaire	Not possible to calculate	2003	[56]
	Home	HRQoL	The 12-item short form health survey	Not possible to calculate	2003	[56]
	Home	Length of hospitalization	Number of days	⎼0.8	2003	[56]
	Home	Mortality	Number (%) of patients that died	0.6	2003	[56]
	Home	Patients’ satisfaction	Study Specific Questionnaire/Survey	Not possible to calculate	2003	[56]
	Inpatient and Home	Hospital readmission	Number (%) of patients readmited	0.4	2013	[57]
	Inpatient and Home	HRQoL	St. George’s respiratory questionnaire	Not possible to calculate	2013	[57]
	Inpatient and Home	Mortality	Number (%) of patients that died	0.5	2013	[57]
	Inpatient and Home	HRQoL	St. George’s respiratory questionnaire	[0.2; 0.3]	2019	[58]
	Inpatient and Home	COPD-related events	Number of events	Not possible to calculate	2019	[58]
	Inpatient and Home	Mortality	Number (%) of patients that died	1.2	2019	[58]
	Inpatient and Home	Disease knowledge	Bristol COPD knowledge questionnaire	0.9	2018	[59]
	Inpatient and Home	Disease knowledge	Lung information needs questionnaire	⎼0.3	2018	[59]
	Inpatient and Home	Patients’ satisfaction	Study Specific Questionnaire/Survey	Not possible to calculate	2018	[59]

## Sheet: References
	8. Reference list of the included papers.
	Please click on a reference from the list to access the website from where the paper is available.
	Number	Reference
	18.	Benzo R, Vickers K, Novotny PJ, Tucker S, Hoult J, Neuenfeldt P, et al. Health coaching and chronic obstructive pulmonary disease rehospitalization. A randomized study. American journal of respiratory and critical care medicine. 2016;194(6):672-80.
	19.	Casas A, Troosters T, Garcia-Aymerich J, Roca J, Hernández C, Alonso A, et al. Integrated care prevents hospitalisations for exacerbations in COPD patients. European Respiratory Journal. 2006;28(1):123-30.
	20.	Cross JL, Elender F, Barton G, Clark A, Shepstone L, Blyth A, et al. Evaluation of the effectiveness of manual chest physiotherapy techniques on quality of life at six months post exacerbation of COPD (MATREX): a randomised controlled equivalence trial. BMC pulmonary medicine. 2012;12(1):33.
	21.	Johnson-Warrington V, Rees K, Gelder C, Morgan MD, Singh SJ. Can a supported self-management program for COPD upon hospital discharge reduce readmissions? A randomized controlled trial. International journal of chronic obstructive pulmonary disease. 2016;11:1161.
	22.	Osadnik CR, McDonald CF, Miller BR, Hill CJ, Tarrant B, Steward R, et al. The effect of positive expiratory pressure (PEP) therapy on symptoms, quality of life and incidence of re-exacerbation in patients with acute exacerbations of chronic obstructive pulmonary disease: a multicentre, randomised controlled trial. Thorax. 2014;69(2):137-43.
	23.	Puhan MA, Spaar A, Frey M, Turk A, Brändli O, Ritscher D, et al. Early versus late pulmonary rehabilitation in chronic obstructive pulmonary disease patients with acute exacerbations: a randomized trial. Respiration. 2012;83(6):499-506.
	24.	Ali MS, Talwar D, Jain S. The effect of a short-term pulmonary rehabilitation on exercise capacity and quality of life in patients hospitalised with acute exacerbation of chronic obstructive pulmonary disease. The Indian Journal of Chest Diseases & Allied Sciences. 2014.
	25.	Babu AS, Noone MS, Haneef M, Samuel P. The effects of ‘on-call/out of hours’ physical therapy in acute exacerbations of chronic obstructive pulmonary disease: a randomized controlled trial. Clinical rehabilitation. 2010;24(9):802-9.
	26.	Borges RC, Carvalho CR. Impact of resistance training in chronic obstructive pulmonary disease patients during periods of acute exacerbation. Archives of physical medicine and rehabilitation. 2014;95(9):1638-45.
	27.	Chaplin EJL, Houchen L, Greening NJ, Harvey‐Dunstan T, Morgan MD, Steiner MC, et al. Neuromuscular stimulation of quadriceps in patients hospitalised during an exacerbation of COPD: a comparison of low (35 Hz) and high (50 Hz) frequencies. Physiotherapy Research International. 2013;18(3):148-56.
	28.	Deepak T, Mohapatra P, Janmeja A, Sood P, Gupta M. Outcome of pulmonary rehabilitation in patients after acute exacerbation of chronic obstructive pulmonary disease. The Indian journal of chest diseases & allied sciences. 2014;56(1):7-12.
	29.	Eaton T, Young P, Fergusson W, Moodie L, Zeng I, O'kane F, et al. Does early pulmonary rehabilitation reduce acute health‐care utilization in COPD patients admitted with an exacerbation? A randomized controlled study. Respirology. 2009;14(2):230-8.
	30.	Greulich T, Nell C, Koepke J, Fechtel J, Franke M, Schmeck B, et al. Benefits of whole body vibration training in patients hospitalised for COPD exacerbations-a randomized clinical trial. BMC pulmonary medicine. 2014;14(1):60.
	31.	He M, Yu S, Wang L, Lv H, Qiu Z. Efficiency and safety of pulmonary rehabilitation in acute exacerbation of chronic obstructive pulmonary disease. Medical science monitor: international medical journal of experimental and clinical research. 2015;21:806.
	32.	Kirsten D, Taube C, Lehnigk B, Jörres R, Magnussen H. Exercise training improves recovery in patients with COPD after an acute exacerbation. Respiratory medicine. 1998;92(10):1191-8.
	33.	Ko FW, Dai DL, Ngai J, Tung A, Ng S, Lai K, et al. Effect of early pulmonary rehabilitation on health care utilization and health status in patients hospitalized with acute exacerbations of COPD. Respirology. 2011;16(4):617-24.
	34.	Liao L-Y, Chen K-M, Chung W-S, Chien J-Y. Efficacy of a respiratory rehabilitation exercise training package in hospitalized elderly patients with acute exacerbation of COPD: a randomized control trial. International journal of chronic obstructive pulmonary disease. 2015;10:1703.
	35.	Man WD, Polkey MI, Donaldson N, Gray BJ, Moxham J. Community pulmonary rehabilitation after hospitalisation for acute exacerbations of chronic obstructive pulmonary disease: randomised controlled study. Bmj. 2004;329(7476):1209.
	36.	Murphy N, Bell C, Costello RW. Extending a home from hospital care programme for COPD exacerbations to include pulmonary rehabilitation. Respiratory medicine. 2005;99(10):1297-302.
	37.	Nava S. Rehabilitation of patients admitted to a respiratory intensive care unit. Archives of physical medicine and rehabilitation. 1998;79(7):849-54.
	38.	Seymour JM, Moore L, Jolley CJ, Ward K, Creasey J, Steier JS, et al. Outpatient pulmonary rehabilitation following acute exacerbations of COPD. Thorax. 2010;65(5):423-8.
	39.	Song HY, Yong SJ, Hur HK. Effectiveness of a Brief Self‐Care Support Intervention for Pulmonary Rehabilitation Among the Elderly Patients with Chronic Obstructive Pulmonary Disease in Korea. Rehabilitation Nursing. 2014;39(3):147-56.
	40.	Tang CY, Blackstock FC, Clarence M, Taylor NF. Early rehabilitation exercise program for inpatients during an acute exacerbation of chronic obstructive pulmonary disease: a randomized controlled trial. Journal of cardiopulmonary rehabilitation and prevention. 2012;32(3):163-9.
	41.	Torres-Sánchez I, Valenza MC, Cabrera-Martos I, López-Torres I, Benítez-Feliponi Á, Conde-Valero A. Effects of an Exercise Intervention in Frail Older Patients with Chronic Obstructive Pulmonary Disease Hospitalized due to an Exacerbation: A Randomized Controlled Trial. COPD: Journal of Chronic Obstructive Pulmonary Disease. 2017;14(1):37-42.
	42.	Torres-Sánchez I, Valenza MC, Sáez-Roca G, Cabrera-Martos I, López-Torres I, Rodríguez-Torres J. Results of a multimodal program during hospitalization in obese COPD exacerbated patients. COPD: Journal of Chronic Obstructive Pulmonary Disease. 2016;13(1):19-25.
	43.	Troosters T, Probst VS, Crul T, Pitta F, Gayan-Ramirez G, Decramer M, et al. Resistance training prevents deterioration in quadriceps muscle function during acute exacerbations of chronic obstructive pulmonary disease. American journal of respiratory and critical care medicine. 2010;181(10):1072-7.
	44.	Kjærgaard JL, Juhl CB, Lange P, Wilcke JT. Early pulmonary rehabilitation after acute exacerbation of COPD: a randomised controlled trial. ERJ open research. 2020;6(1).
	45.	Lopez-Lopez L, Torres-Sanchez I, Rodriguez-Torres J, Cabrera-Martos I, Cahalin LP, Valenza MC. Randomized feasibility study of twice a day functional electrostimulation in patients with severe chronic obstructive pulmonary disease hospitalized for acute exacerbation. Physiotherapy theory and practice. 2019:1-8.
	46.	Lopez-Lopez L, Valenza MC, Rodriguez-Torres J, Torres-Sanchez I, Granados-Santiago M, Valenza-Demet G. Results on health-related quality of life and functionality of a patient-centered self-management program in hospitalized COPD: a randomized control trial. Disability and rehabilitation. 2019:1-9.
	47.	Garcia-Aymerich J, Hernandez C, Alonso A, Casas A, Rodriguez-Roisin R, Anto JM, et al. Effects of an integrated care intervention on risk factors of COPD readmission. Respiratory medicine. 2007;101(7):1462-9.
	48.	Kodric M, Garuti G, Colomban M, Russi B, Porta RD, Lusuardi M, et al. The effectiveness of a bronchial drainage technique (ELTGOL) in COPD exacerbations. Respirology. 2009;14(3):424-8.
	49.	Eastwood B, Jepsen N, Coulter K, Wong C, Zeng I. Challenges of undertaking a clinical trial using bubble-PEP in an acute exacerbation of chronic obstructive pulmonary disease: A feasibility study. New Zealand Journal of Physiotherapy. 2016;44(1):8-16.
	50.	Basri R, Tahir M, Naseem M. Short-term effects of chest physiotherapy in acute exacerbation of chronic obstructive pulmonary disease. Journal Of Medical Sciences. 2017;25(3):323-7.
	51.	Torres-Sánchez I, Valenza MC, Cebriá i Iranzo MdÀ, Lopez-Lopez L, Moreno-Ramírez MP, Ortiz-Rubio A. Effects of different physical therapy programs on perceived health status in acute exacerbation of chronic obstructive pulmonary disease patients: a randomized clinical trial. Disability and rehabilitation. 2018;40(17):2025-31.
	52.	Yohannes AM, Connolly MJ. Early mobilization with walking aids following hospital admission with acute exacerbation of chronic obstructive pulmonary disease. Clinical rehabilitation. 2003;17(5):465-71.
	53.	Lopez LL, Santiago MG, Galindo MD, Sanchez IT, Rubio AO, Valenza MC. Efficacy of combined electrostimulation in patients with acute exacerbation of COPD: randomised clinical trial. Med Clin. 2018;151(8):323-8.
	54.	Bellone A, Spagnolatti L, Massobrio M, Bellei E, Vinciguerra R, Barbieri A, et al. Short-term effects of expiration under positive pressure in patients with acute exacerbation of chronic obstructive pulmonary disease and mild acidosis requiring non-invasive positive pressure ventilation. Intensive care medicine. 2002;28(5):581-5.
	55.	Valenza MC, Valenza-Peña G, Torres-Sánchez I, González-Jiménez E, Conde-Valero A, Valenza-Demet G. Effectiveness of controlled breathing techniques on anxiety and depression in hospitalized patients with COPD: a randomized clinical trial. Respiratory care. 2014;59(2):209-15.
	56.	Hernandez C, Casas A, Escarrabill J, Alonso J, Puig-Junoy J, Farrero E, et al. Home hospitalisation of exacerbated chronic obstructive pulmonary disease patients. European Respiratory Journal. 2003;21(1):58-67.
	57.	Lainscak M, Kadivec S, Kosnik M, Benedik B, Bratkovic M, Jakhel T, et al. Discharge coordinator intervention prevents hospitalizations in patients with COPD: a randomized controlled trial. Journal of the American Medical Directors Association. 2013;14(6):450. e1-. e6.
	58.	Aboumatar H, Naqibuddin M, Chung S, Chaudhry H, Kim SW, Saunders J, et al. Effect of a hospital-initiated program combining transitional care and long-term self-management support on outcomes of patients hospitalized with chronic obstructive pulmonary disease: a randomized clinical trial. Jama. 2019;322(14):1371-80.
	59.	Janaudis-Ferreira T, Carr SJ, Harrison SL, Gershon AS, Milner SC, Carr S, et al. Can Patients With COPD Assimilate Disease-Specific Information During an Acute Exacerbation?: Results of a Pilot Randomized Controlled Trial. Chest. 2018;154(3):588-96.
